# Supplementary material
Source: publisher figshare collection journal article supplement (https://acs.figshare.com/ndownloader/files/10274373)
Supplement: Supplementary file 1 [file 10274373]

# Supporting Information for

## Selective, ambient-temperature C-4 deuteration of pyrazole derivatives by D<sub>2</sub>O

Basil M. Ahmed and Gellert Mezei\*

*Department of Chemistry, Western Michigan University, Kalamazoo, Michigan, USA*

\*Email: [gellert.mezei@wmich.edu](mailto:gellert.mezei@wmich.edu)

| CONTENTS                                                                                                                               | PAGE    |
|----------------------------------------------------------------------------------------------------------------------------------------|---------|
| 1. <sup>1</sup> H NMR monitoring of the deuteration of pyrazole substrates in D <sub>2</sub> O (or CD <sub>3</sub> OD) (Figure S1–S11) | S2–S7   |
| 2. Kinetics plots (Figure S12–S24)                                                                                                     | S7–S11  |
| 3. <sup>1</sup> H and <sup>13</sup> C NMR spectra in DMSO- <i>d</i> <sub>6</sub> and D <sub>2</sub> O (Figures S25–S44)                | S12–S21 |

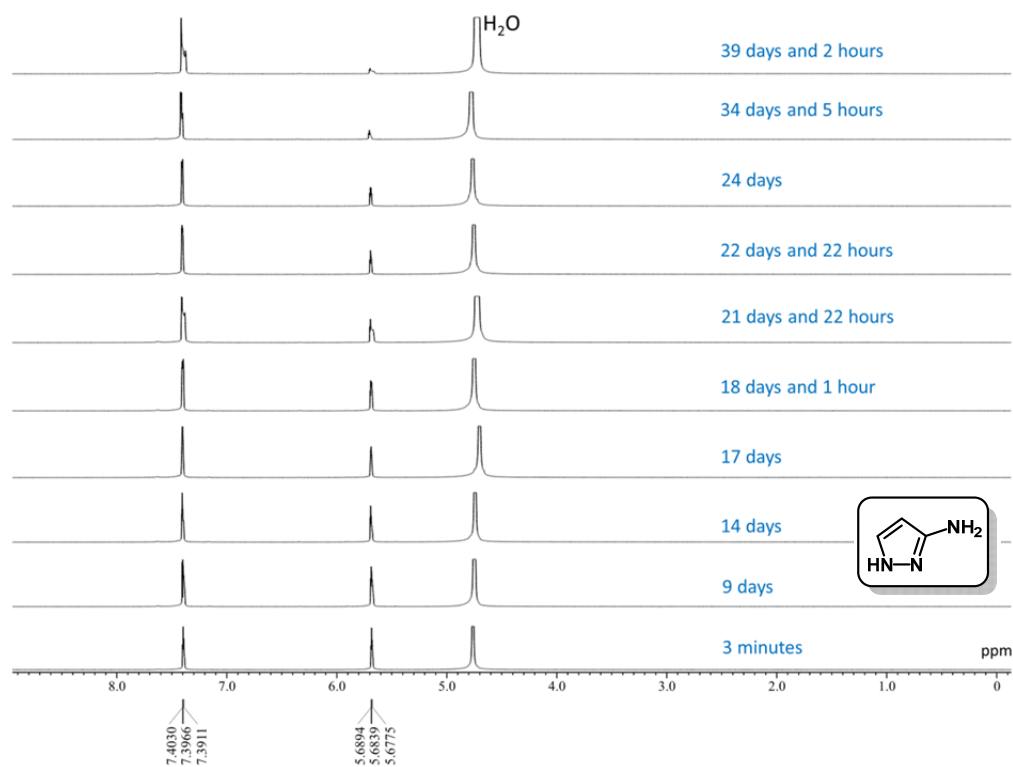

**Figure S1.**  $^1\text{H}$  NMR monitoring of the deuteration of **1** in  $\text{D}_2\text{O}$  in the absence of catalyst at  $25^\circ\text{C}$ .

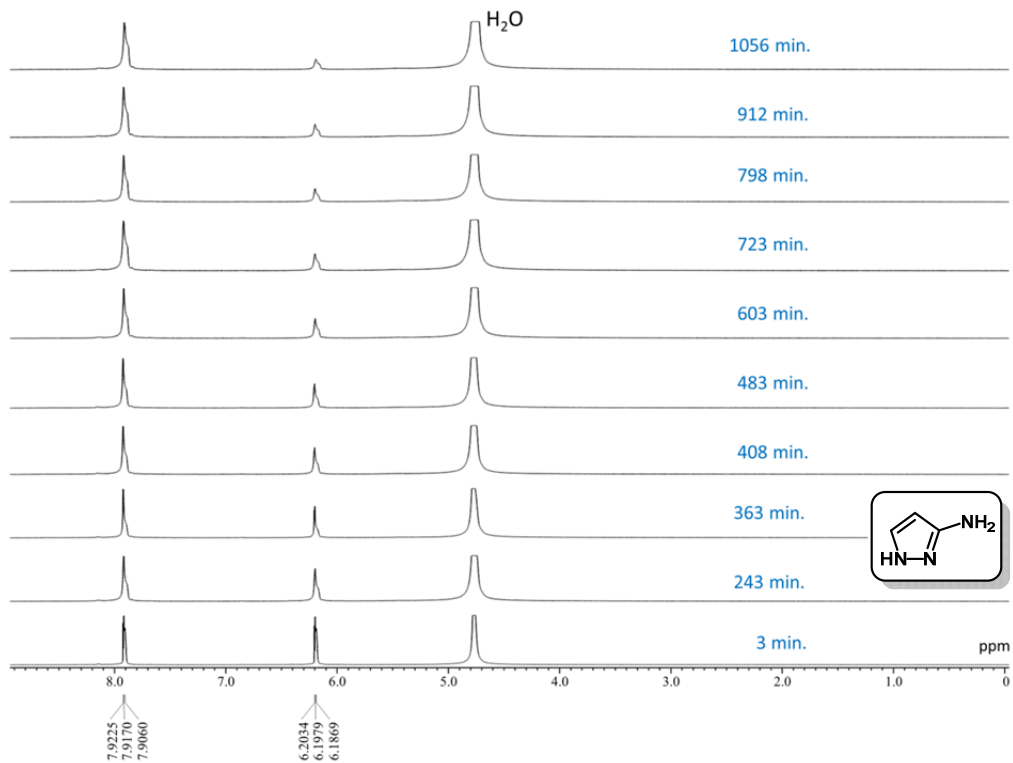

**Figure S2.**  $^1\text{H}$  NMR monitoring of the deuteration of **1** in  $\text{D}_2\text{O}$  in the absence of catalyst at  $70^\circ\text{C}$ .

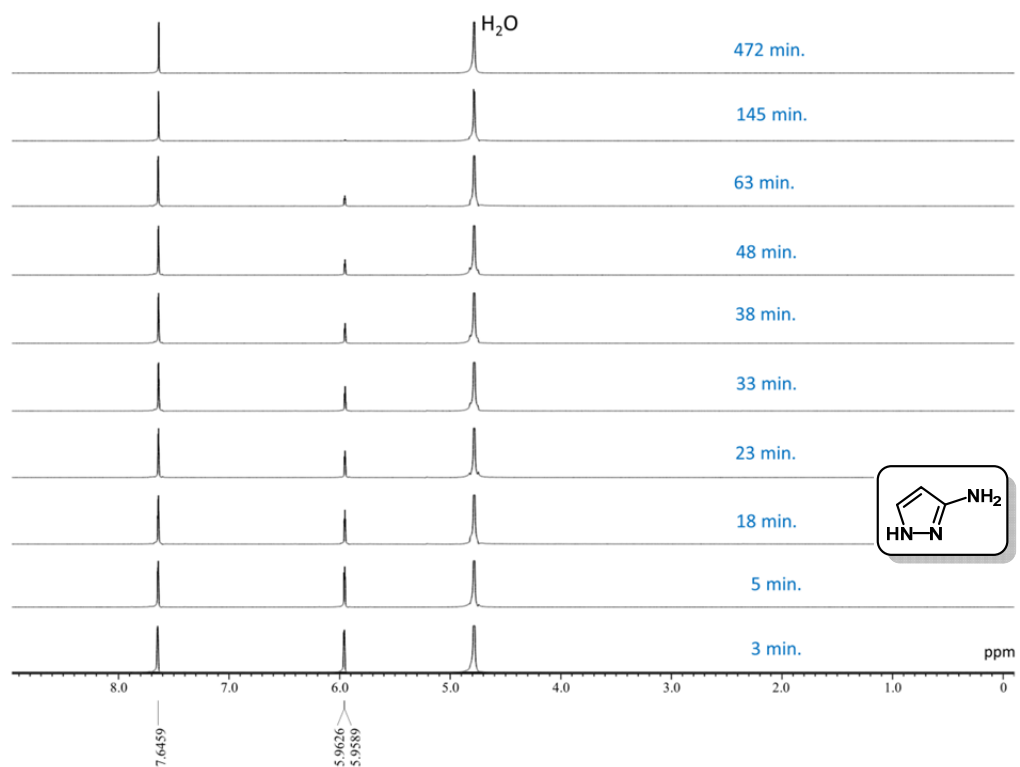

**Figure S3.**  $^1\text{H}$  NMR monitoring of the deuteration of **1** in  $\text{D}_2\text{O}$  with 100 mol %  $\text{DCl}$  at 25  $^\circ\text{C}$ .

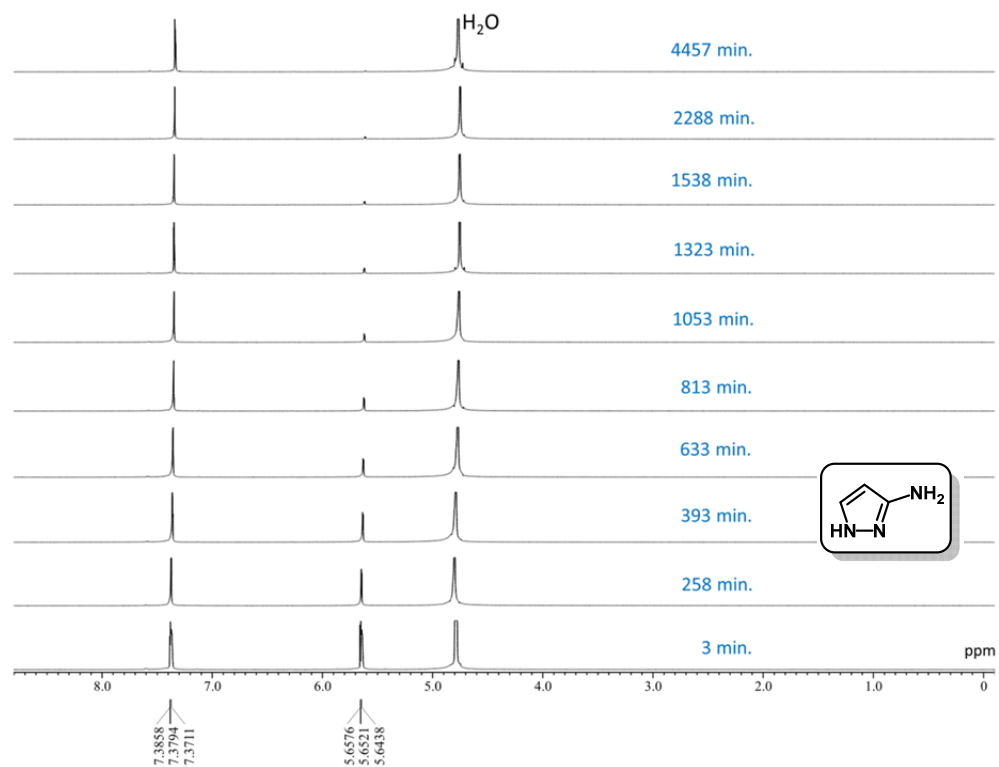

**Figure S4.**  $^1\text{H}$  NMR monitoring of the deuteration of **1** in  $\text{D}_2\text{O}$  with 100 mol %  $\text{NaOD}$  at 25  $^\circ\text{C}$ .

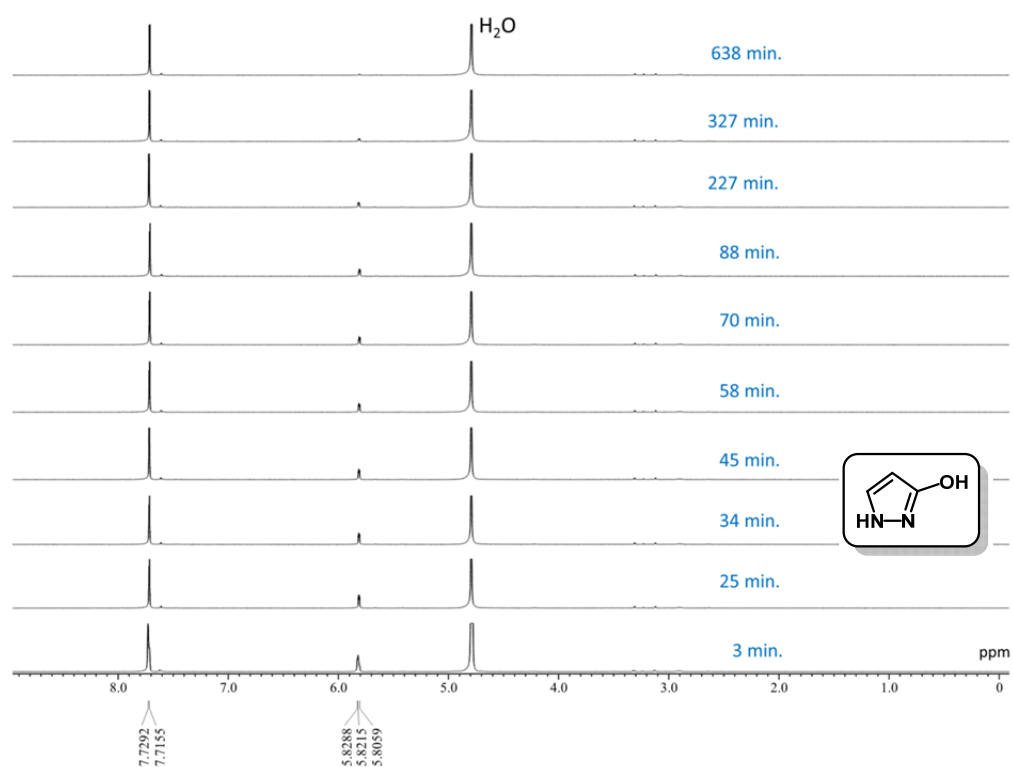

**Figure S5.**  $^1\text{H}$  NMR monitoring of the deuteration of **2** in  $\text{D}_2\text{O}$  with 100 mol % DCl at 25 °C.

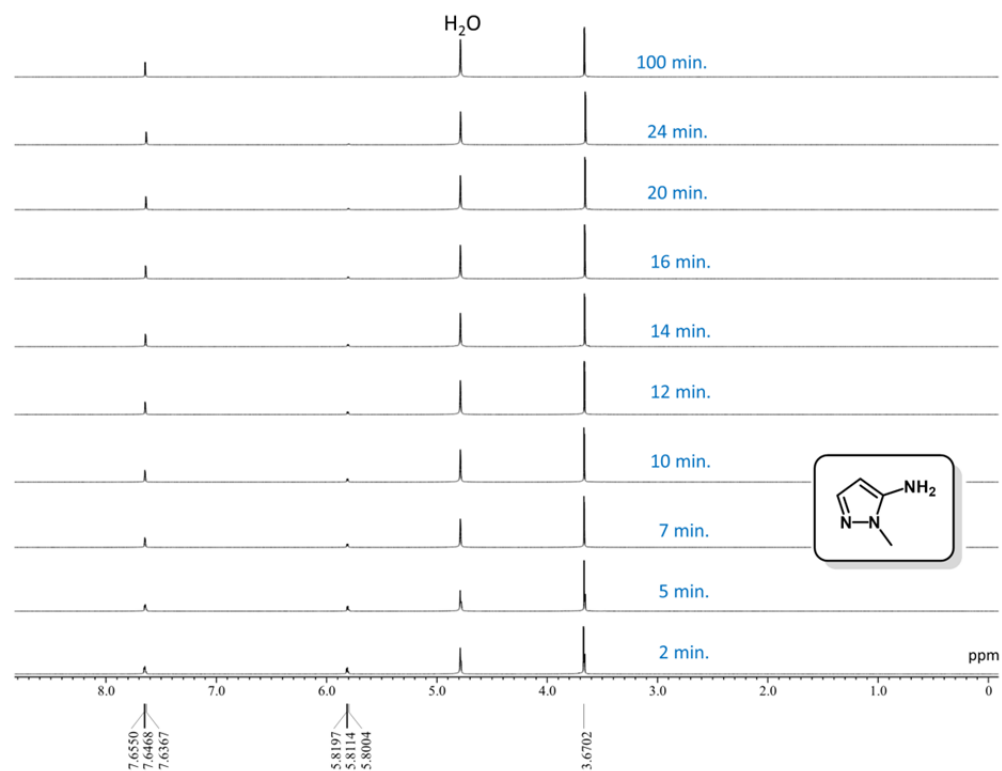

**Figure S6.**  $^1\text{H}$  NMR monitoring of the deuteration of **3** in  $\text{D}_2\text{O}$  with 100 mol % DCl at 25 °C.

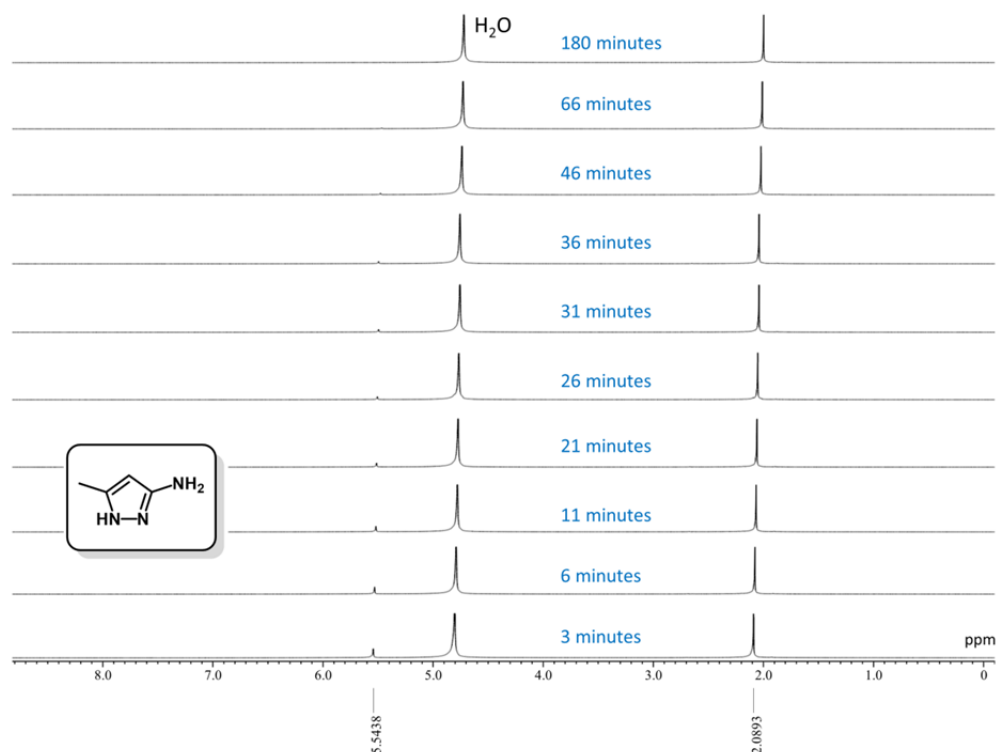

**Figure S7.**  $^1\text{H}$  NMR monitoring of the deuteration of **4** in  $\text{D}_2\text{O}$  with 100 mol % DCl at 25 °C.

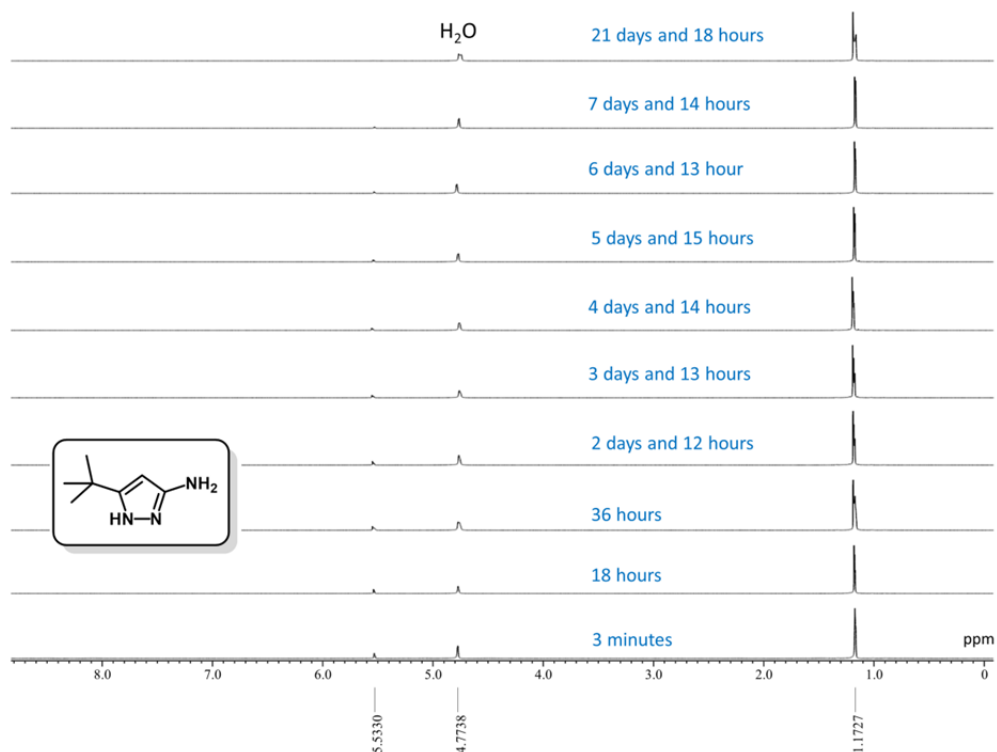

**Figure S8.**  $^1\text{H}$  NMR monitoring of the deuteration of **6** in  $\text{D}_2\text{O}$  in the absence of catalyst at 25 °C.

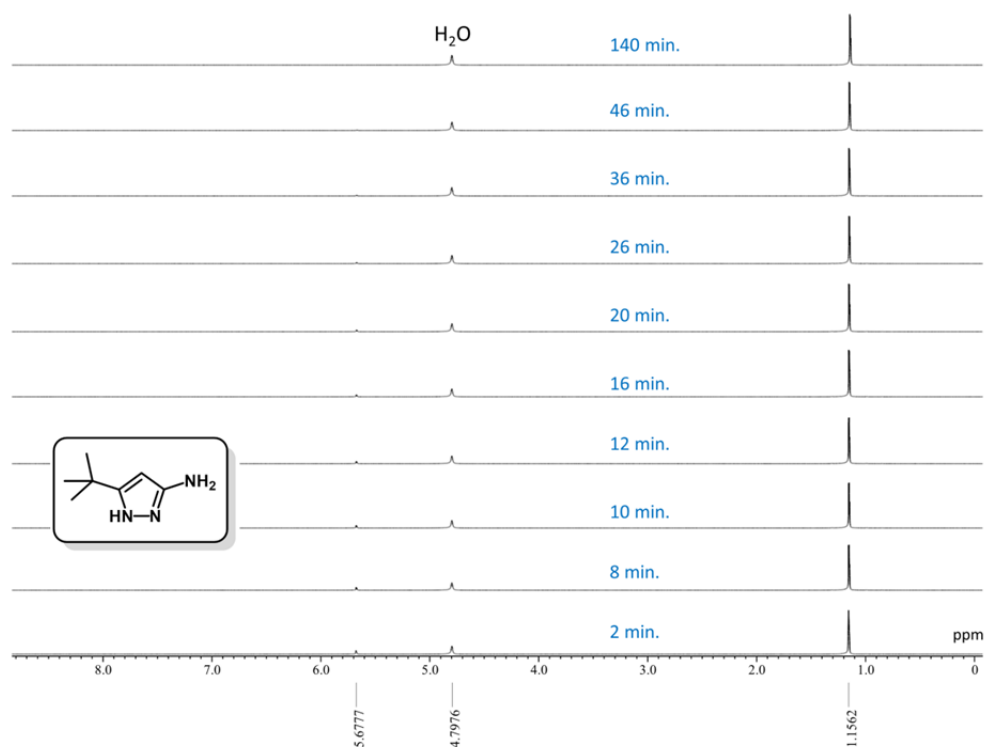

**Figure S9.**  $^1\text{H}$  NMR monitoring of the deuteration of **6** in  $\text{D}_2\text{O}$  with 100 mol % DCl at 25 °C.

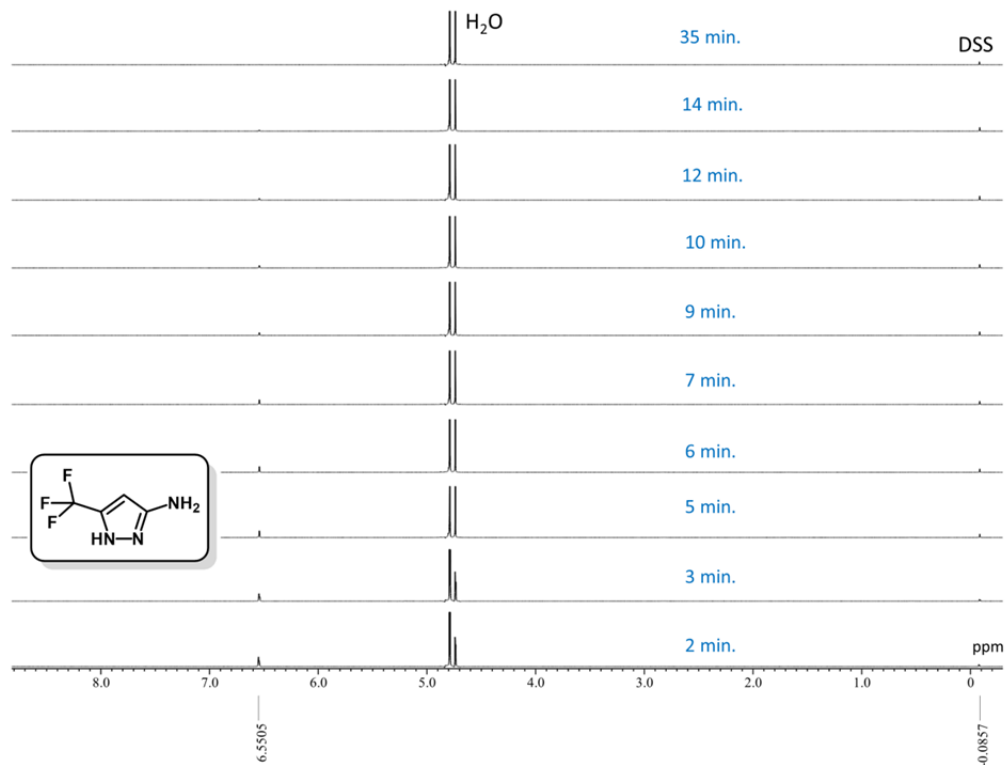

**Figure S10.**  $^1\text{H}$  NMR monitoring of the deuteration of **7** in  $\text{D}_2\text{O}$  with 100 mol % DCl at 25 °C (with DSS sodium salt as reference in a coaxial tube).

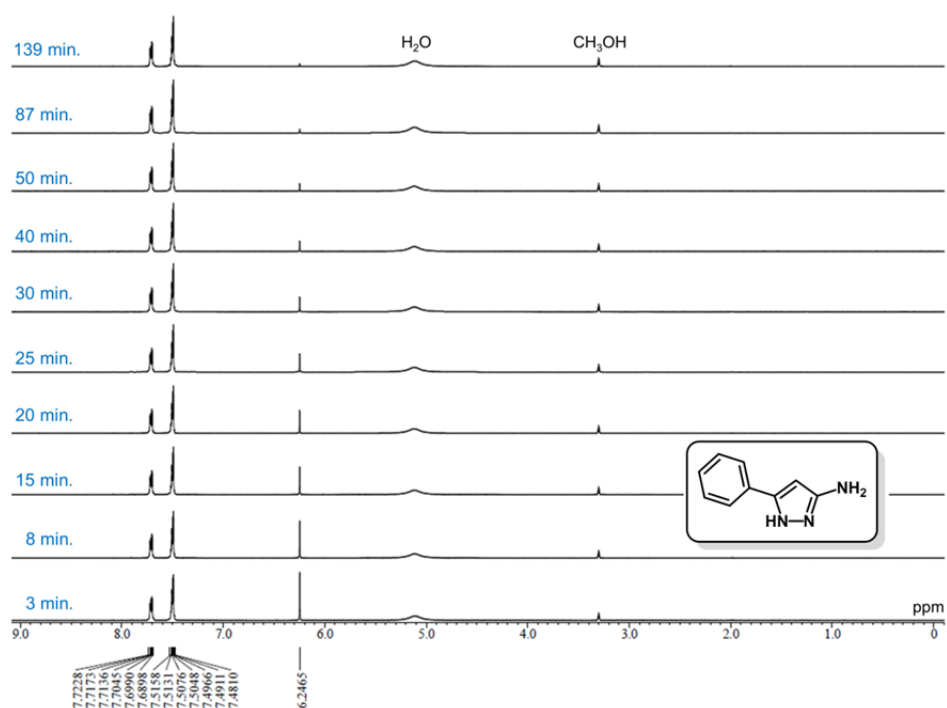

**Figure S11.**  $^1\text{H}$  NMR monitoring of the deuteration of **8** in  $\text{CD}_3\text{OD}$  with 100 mol % DCl at 25  $^\circ\text{C}$ .

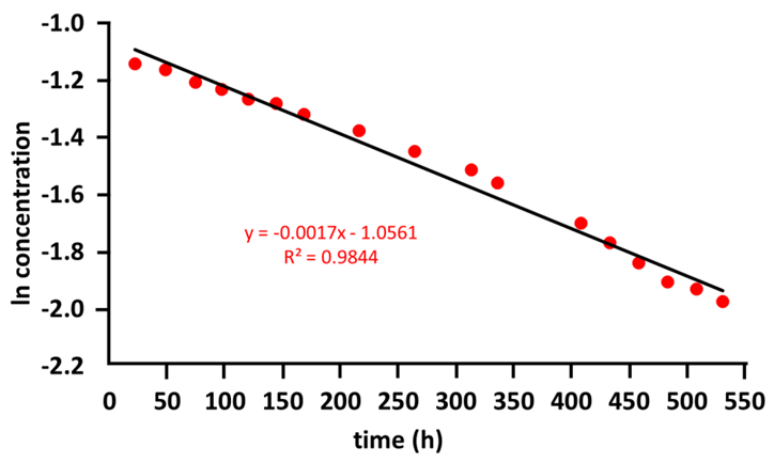

**Figure S12.** Deuteration of **1** in  $\text{D}_2\text{O}$  in the absence of catalyst at 25  $^\circ\text{C}$ .

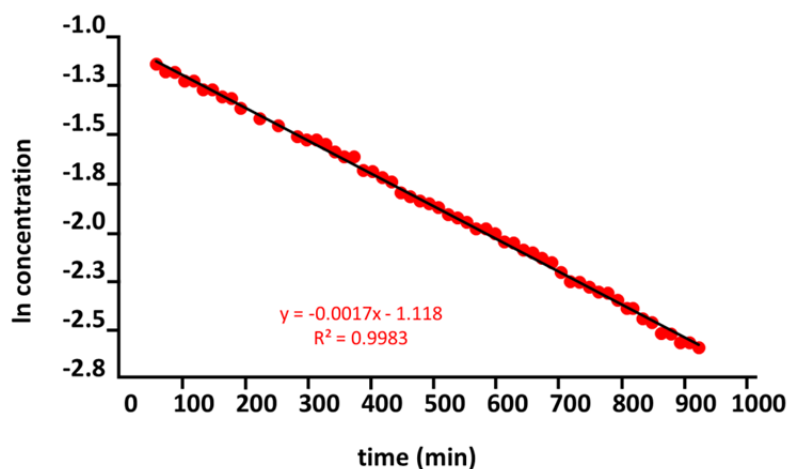

**Figure S13.** Deuteration of **1** in D<sub>2</sub>O in the absence of catalyst at 70 °C.

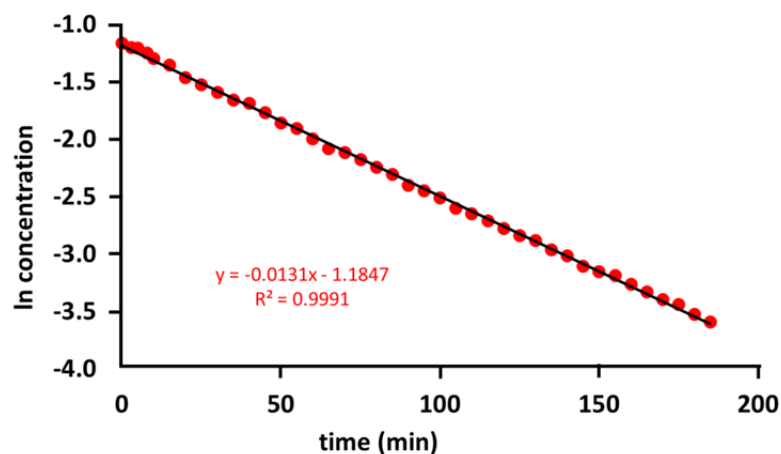

**Figure S14.** Deuteration of **1** in D<sub>2</sub>O with 10 mol % DCl at 25 °C.

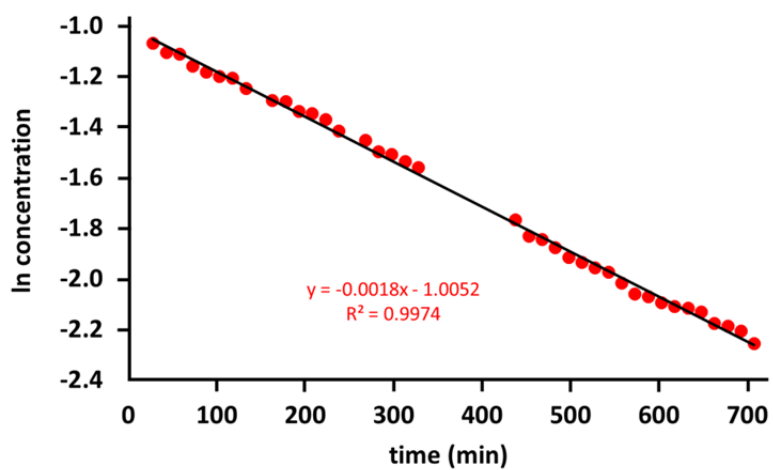

**Figure S15.** Deuteration of **1** in D<sub>2</sub>O with 1 mol % DCl at 25 °C.



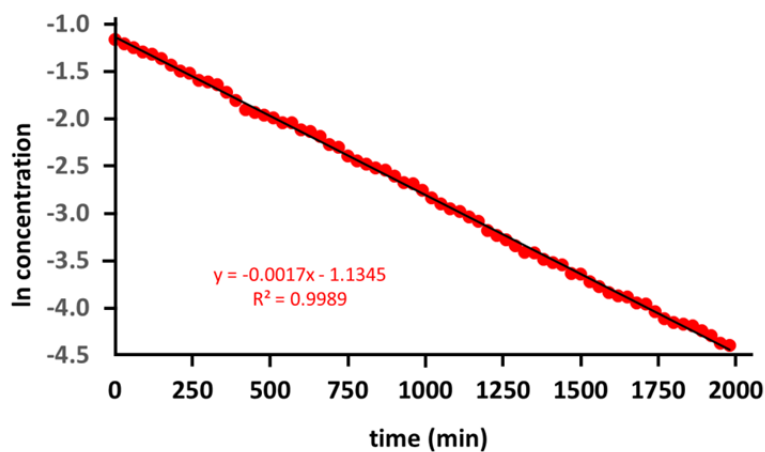

**Figure S16.** Deuteration of **1** in D<sub>2</sub>O with 100 mol % NaOD at 25 °C.

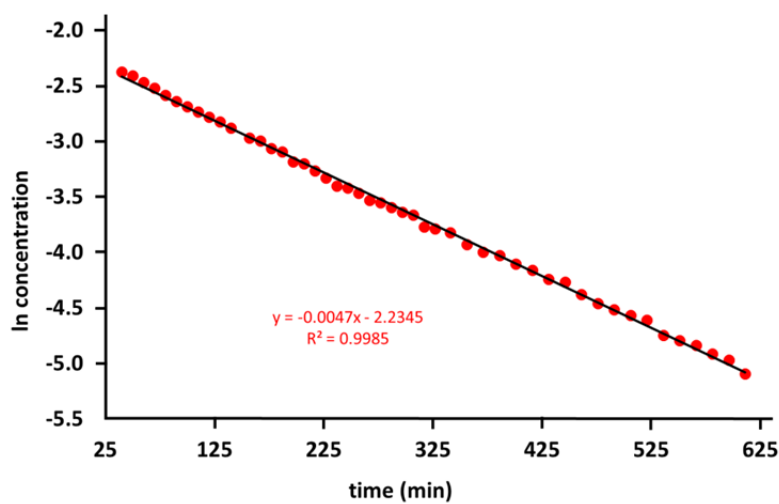

**Figure S17.** Deuteration of **2** in D<sub>2</sub>O with 100 mol % DCl at 25 °C.

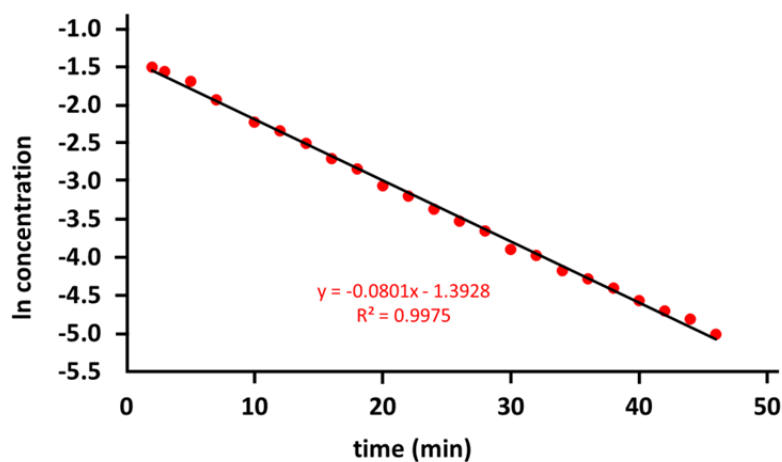

**Figure S18.** Deuteration of **3** in D<sub>2</sub>O with 100 mol % DCl at 25 °C.

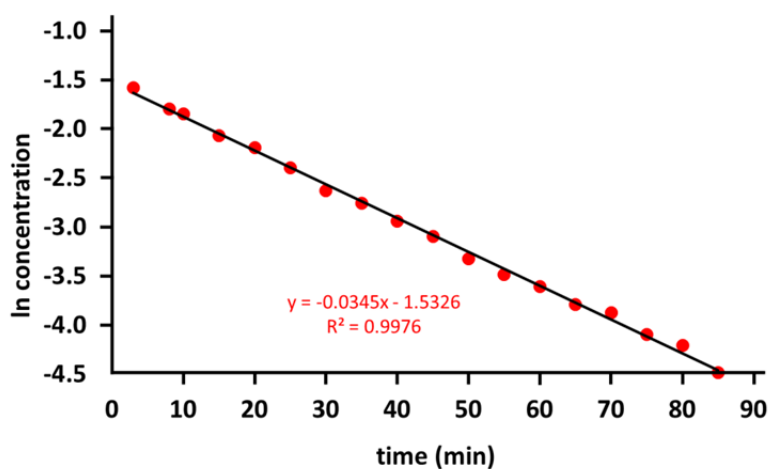

**Figure S19.** Deuteration of **4** in D<sub>2</sub>O with 100 mol % DCl at 25 °C.

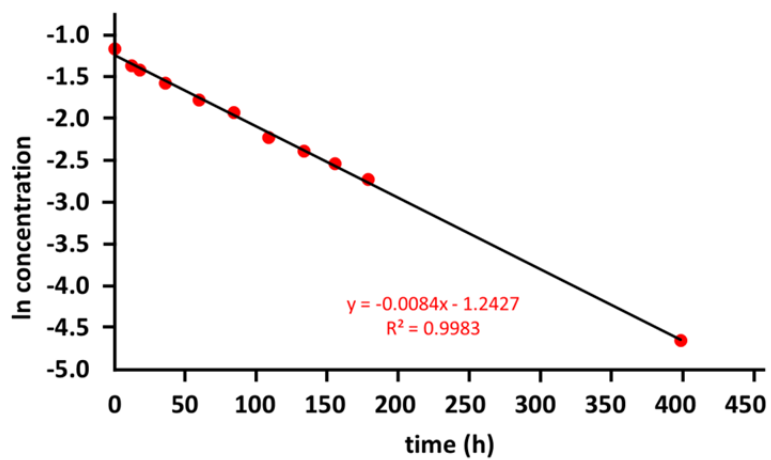

**Figure S20.** Deuteration of **6** in D<sub>2</sub>O in the absence of catalyst at 25 °C.

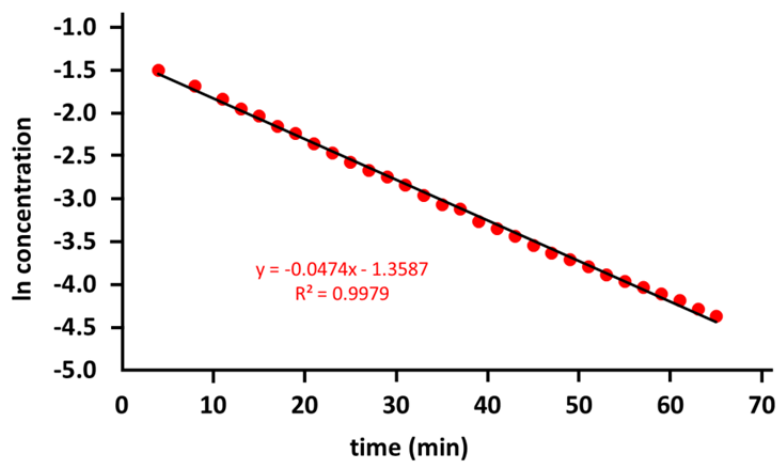

**Figure S21.** Deuteration of **6** in D<sub>2</sub>O with 100 mol % DCl at 25 °C.

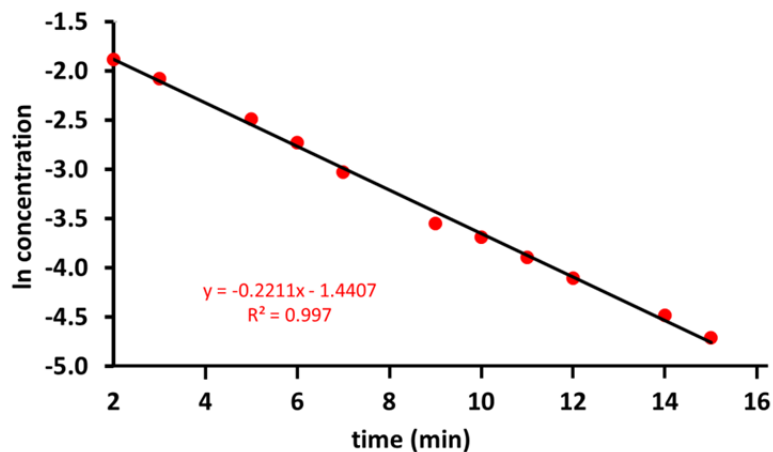

**Figure S22.** Deuteration of **7** in D<sub>2</sub>O with 100 mol % DCl at 25 °C (with DSS sodium salt as reference in a coaxial NMR tube).

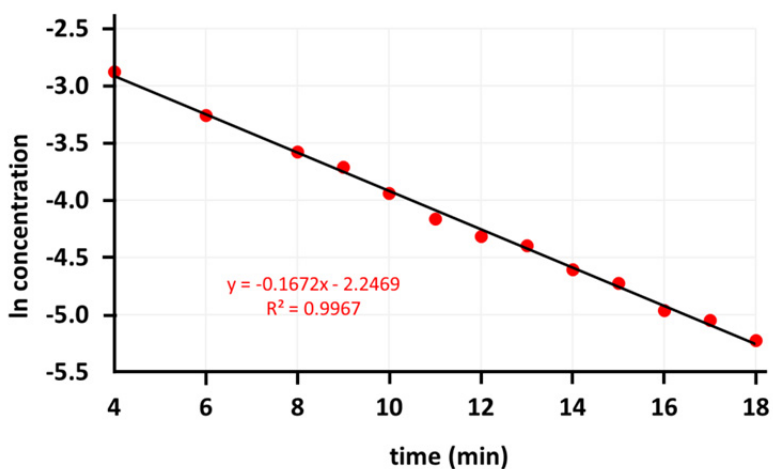

**Figure S23.** Deuteration of **7** in D<sub>2</sub>O (containing dissolved DSS sodium salt as reference) with 100 mol % DCl at 25 °C.

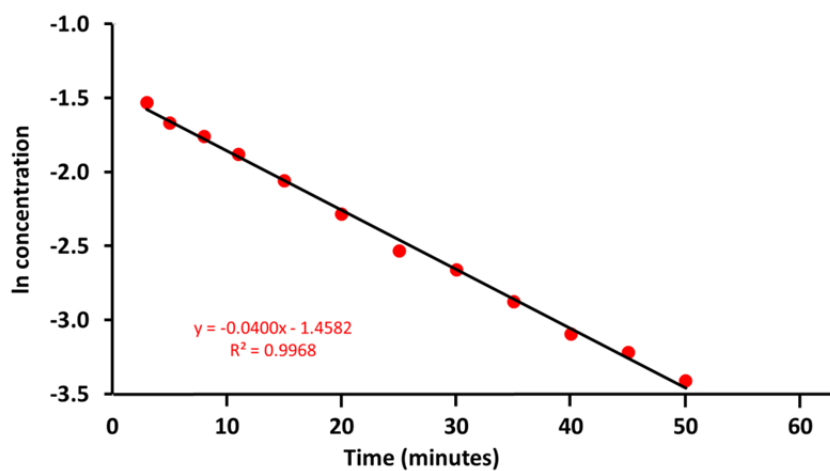

**Figure S24.** Deuteration of **8** in CD<sub>3</sub>OD with 100 mol % DCl at 25 °C.

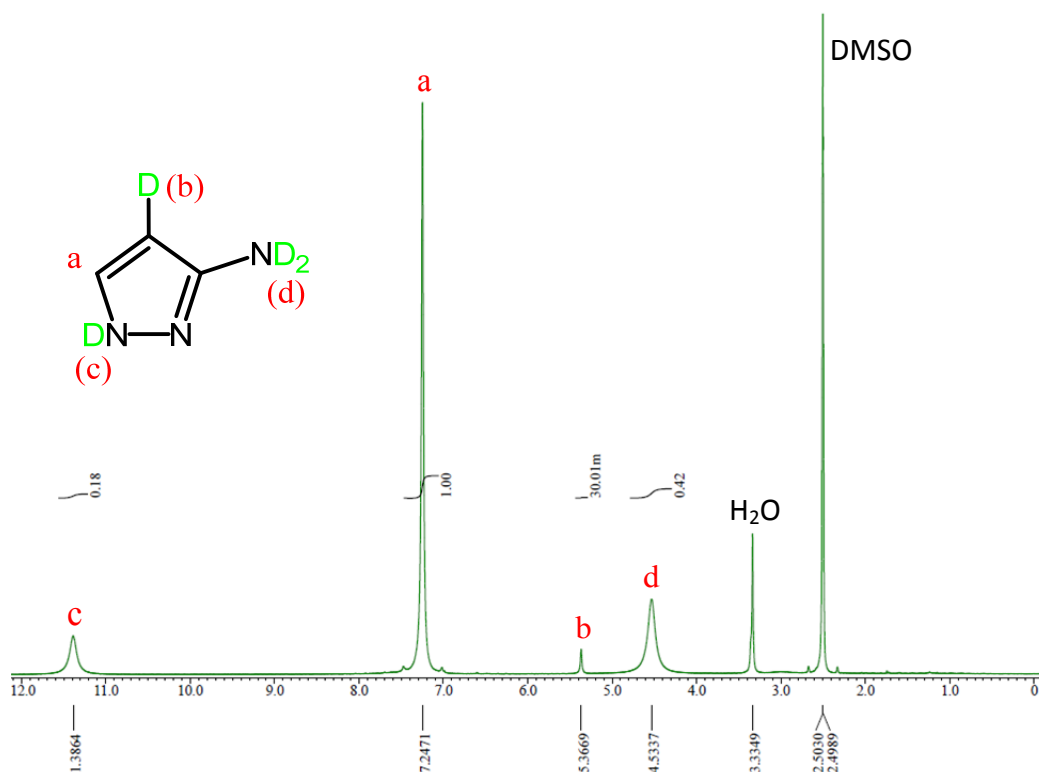

**Figure S25.** <sup>1</sup>H NMR spectrum of partially protiated 3(5)-aminopyrazole- $d_4$  (obtained from **1**) in wet DMSO- $d_6$ .

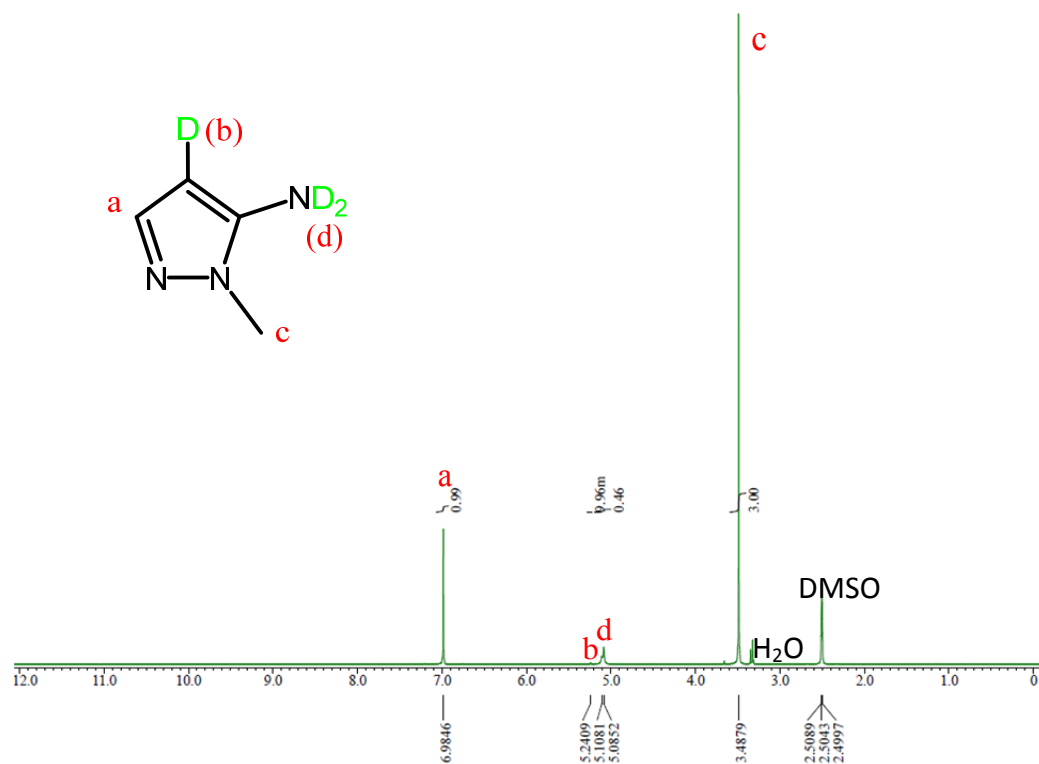

**Figure S26.** <sup>1</sup>H NMR spectrum of partially protiated 5-amino-1-methylpyrazole- $d_3$  (obtained from **3**) in wet DMSO- $d_6$ .

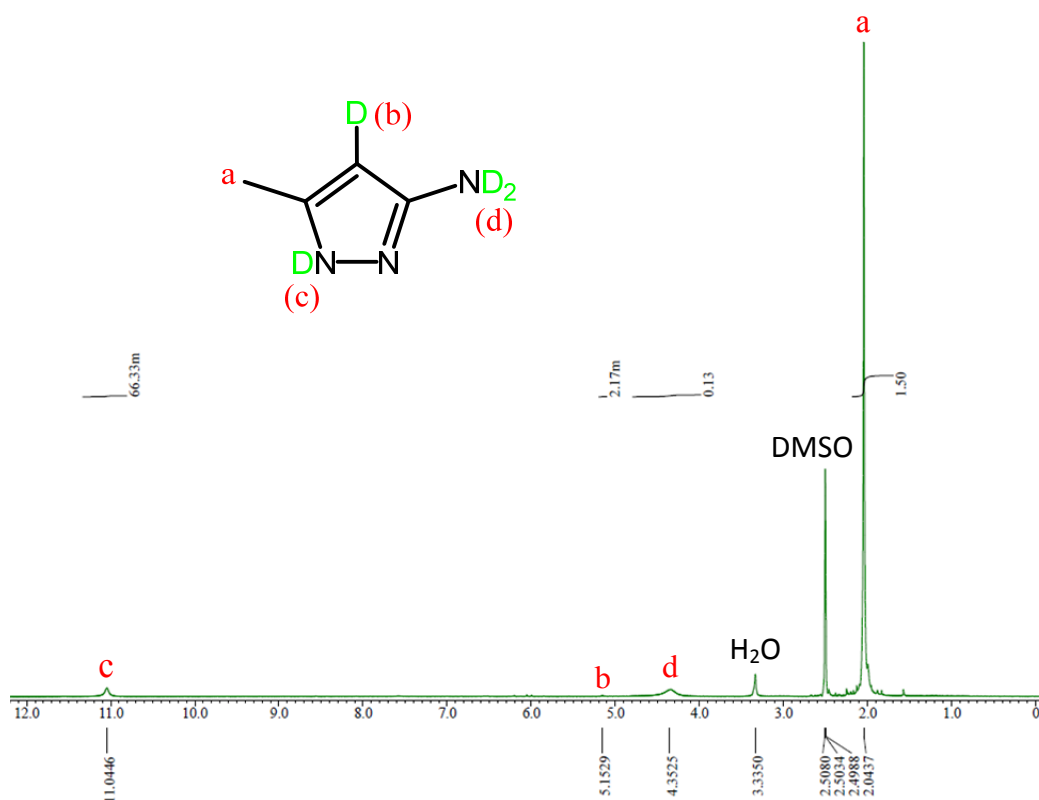

**Figure S27.**  $^1\text{H}$  NMR spectrum of partially protiated 3(5)-amino-5(3)-methylpyrazole- $d_4$  (obtained from **4**) in wet DMSO- $d_6$ .

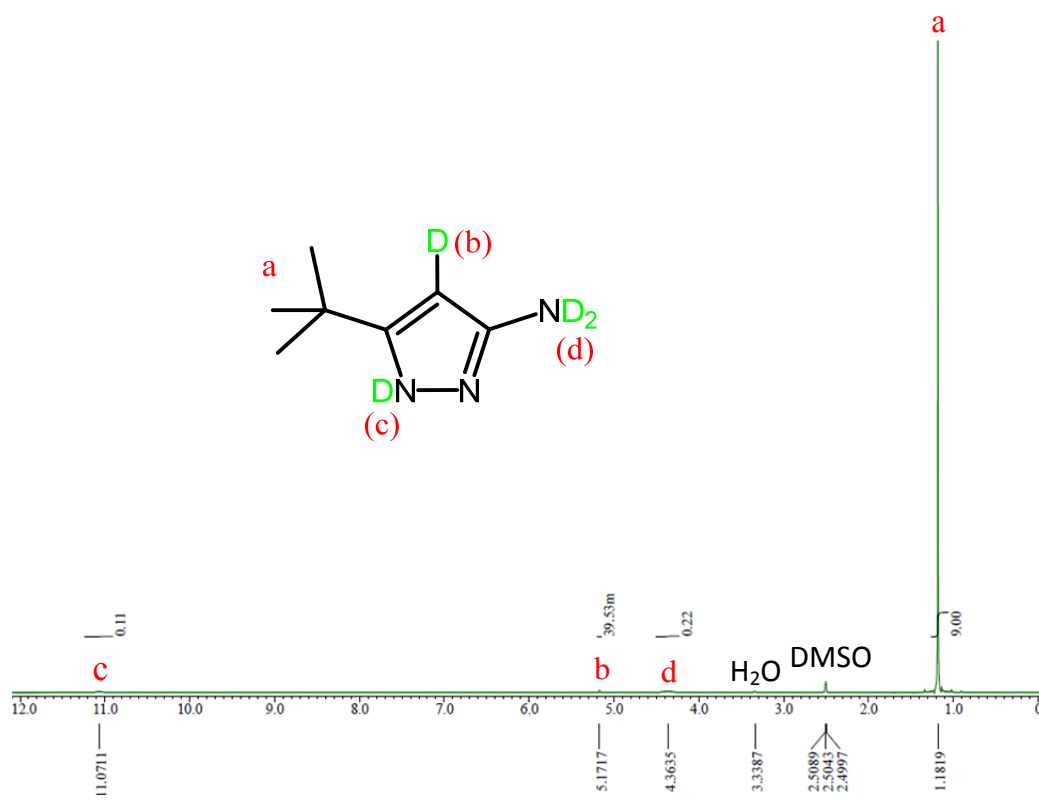

**Figure S28.**  $^1\text{H}$  NMR spectrum of partially protiated 3(5)-amino-5(3)-*tert*-butylpyrazole- $d_4$  (obtained from **6**) in wet DMSO- $d_6$ .

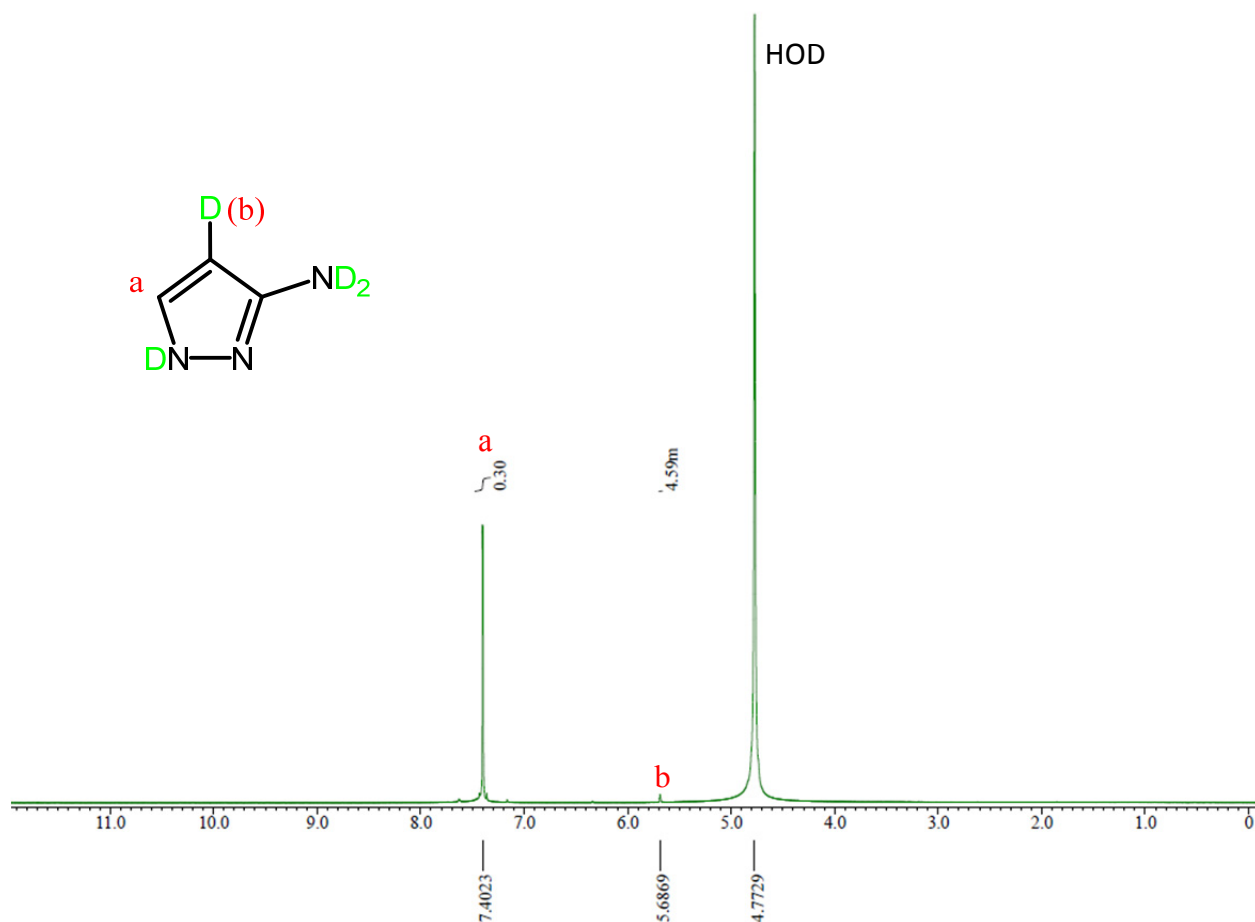

**Figure S29.**  $^1H$  NMR spectrum of 3(5)-aminopyrazole- $d_4$  in D<sub>2</sub>O.

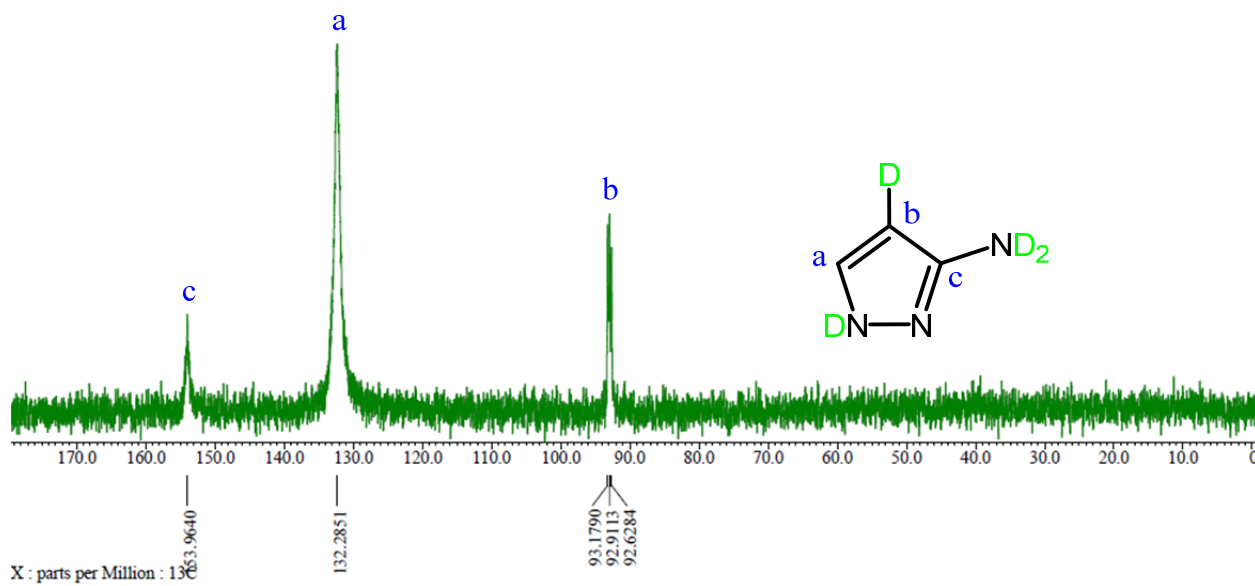

**Figure S30.**  $^{13}C$  NMR spectrum of 3(5)-aminopyrazole- $d_4$  in D<sub>2</sub>O.

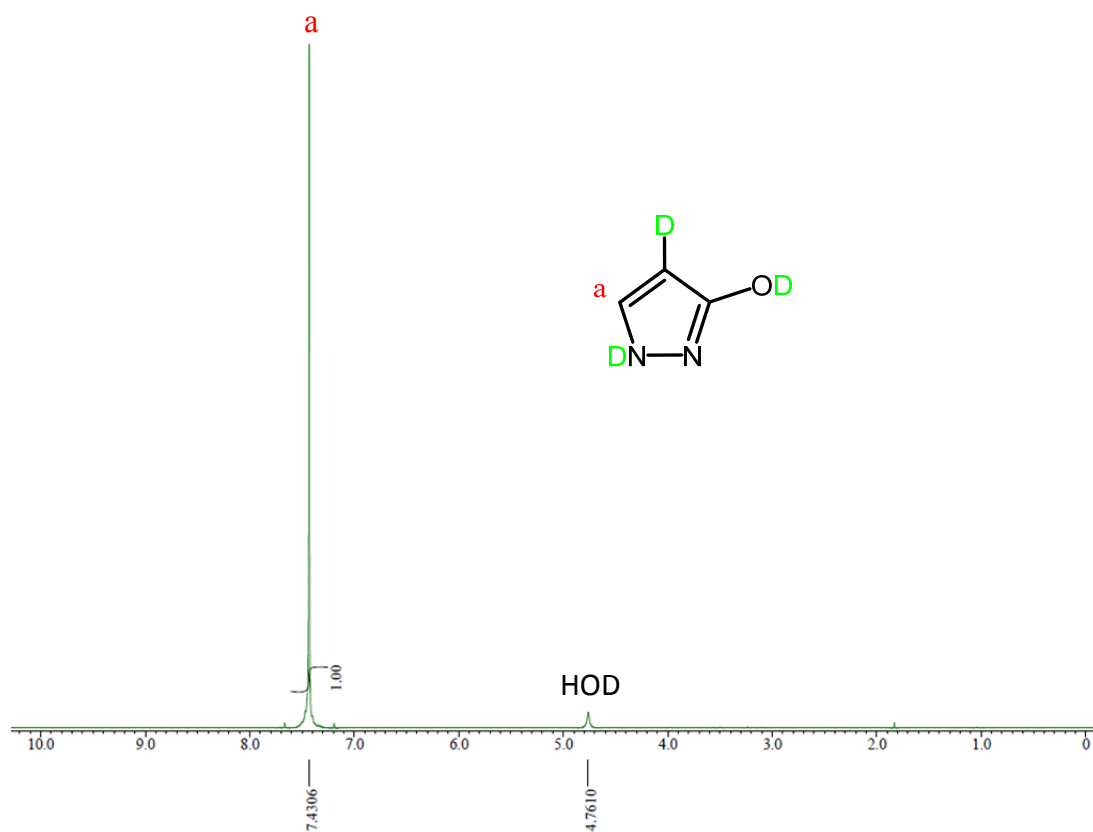

**Figure S31.**  $^1\text{H}$  NMR spectrum of 3(5)-hydroxypyrazole- $d_3$  in D<sub>2</sub>O.

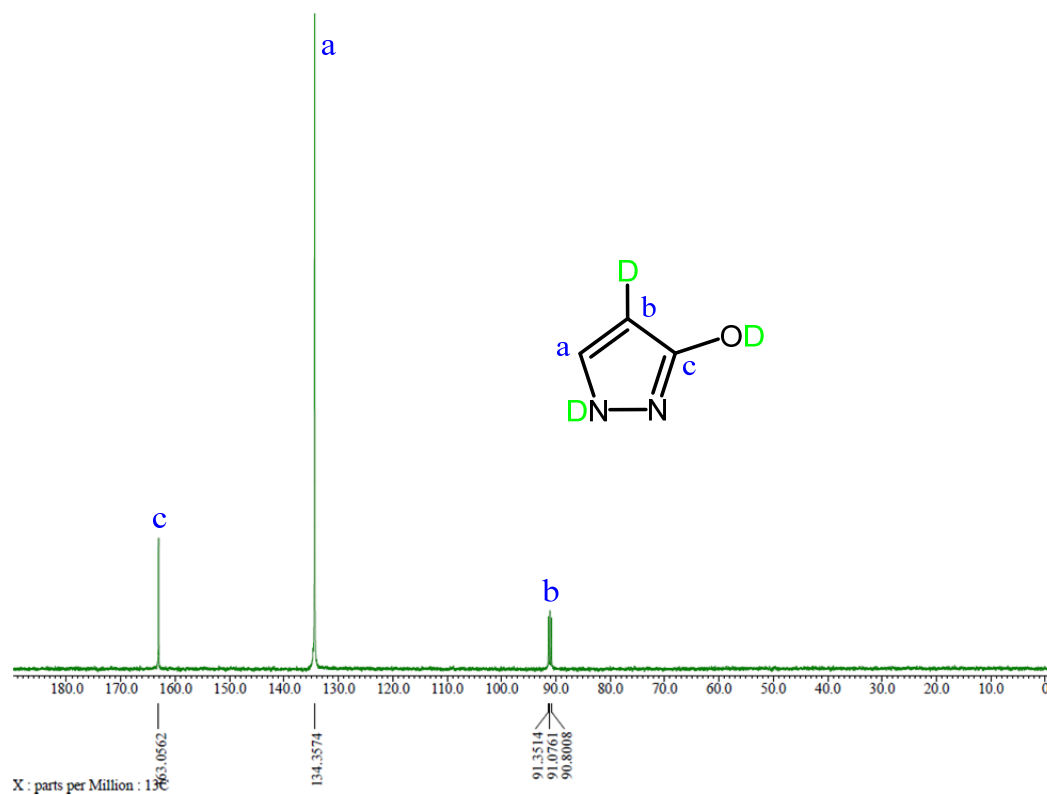

**Figure S32.**  $^{13}\text{C}$  NMR spectrum of 3(5)-hydroxypyrazole- $d_3$  in D<sub>2</sub>O.

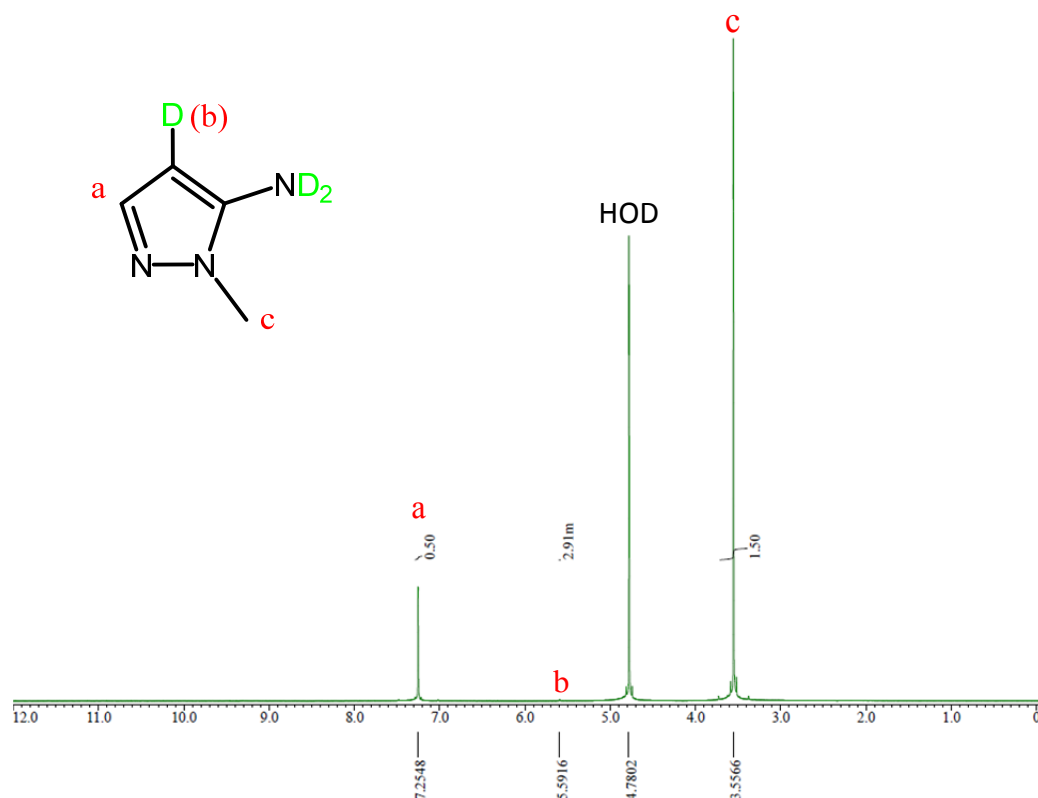

**Figure S33.**  $^1\text{H}$  NMR spectrum of 5-amino-1-methylpyrazole- $d_3$  in  $\text{D}_2\text{O}$ .

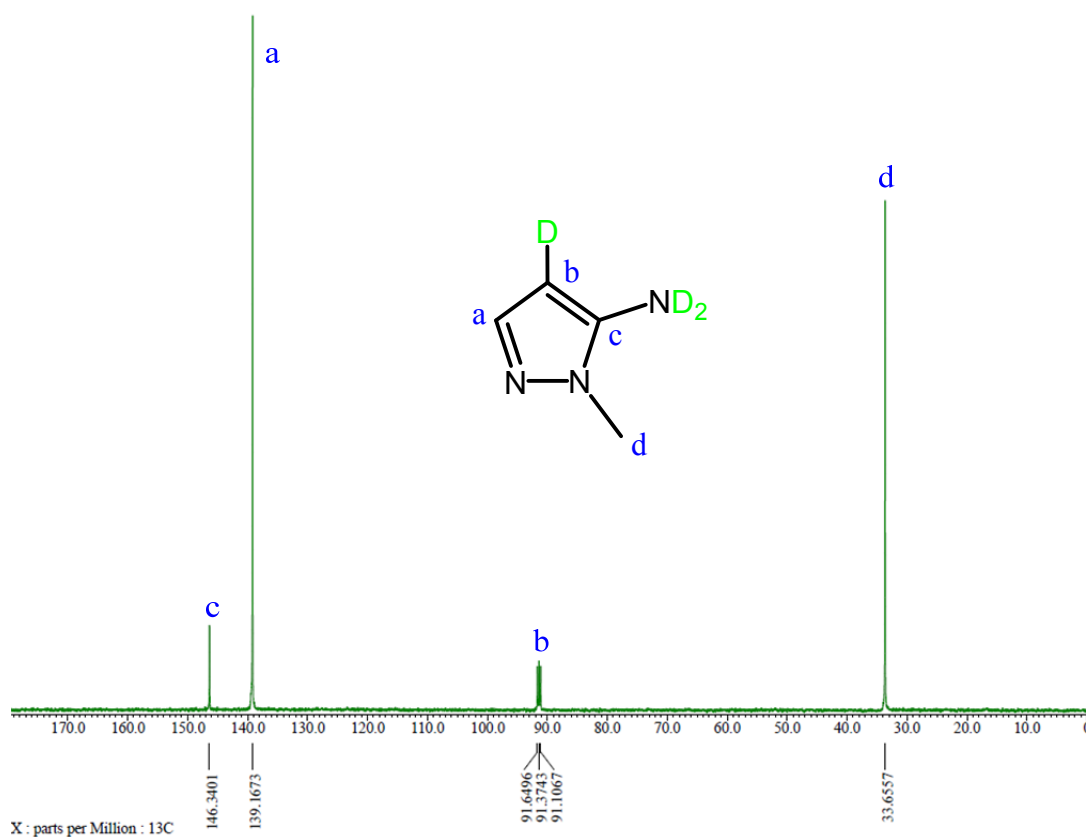

**Figure S34.**  $^{13}\text{C}$  NMR spectrum of 5-amino-1-methylpyrazole- $d_3$  in  $\text{D}_2\text{O}$ .



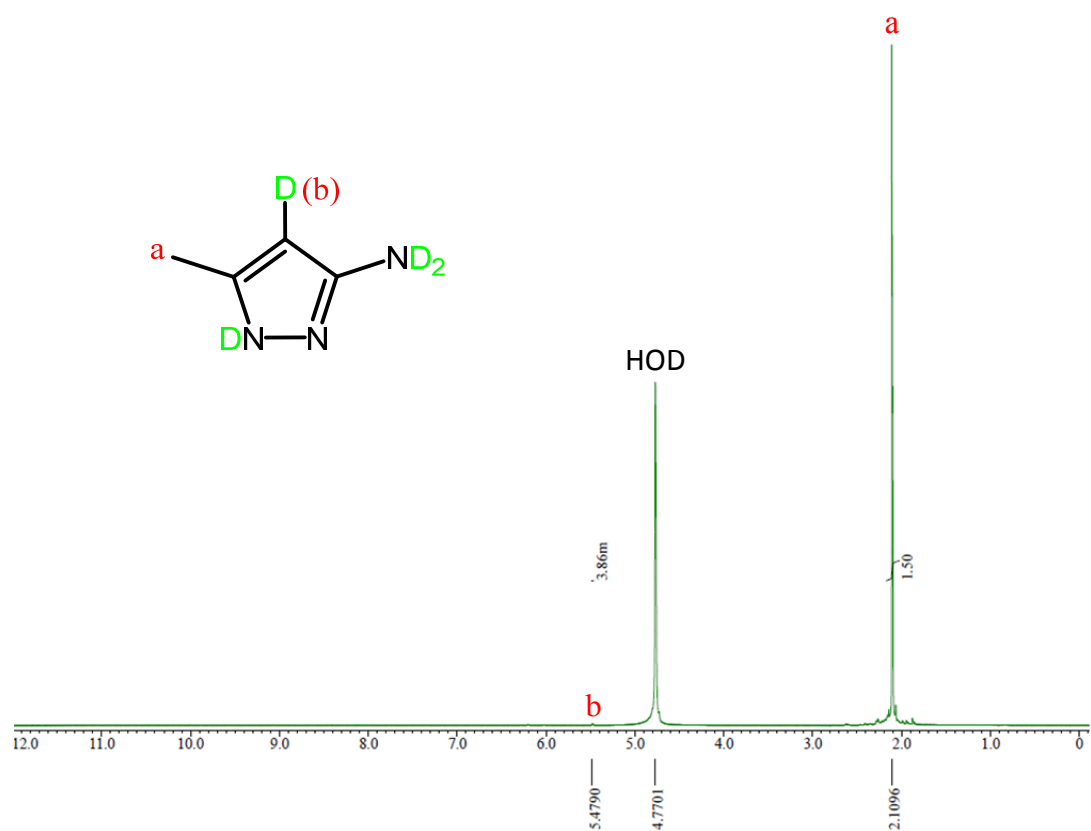

**Figure S35.**  $^1\text{H}$  NMR spectrum of 3(5)-amino-5(3)-methylpyrazole- $d_4$  in  $\text{D}_2\text{O}$ .

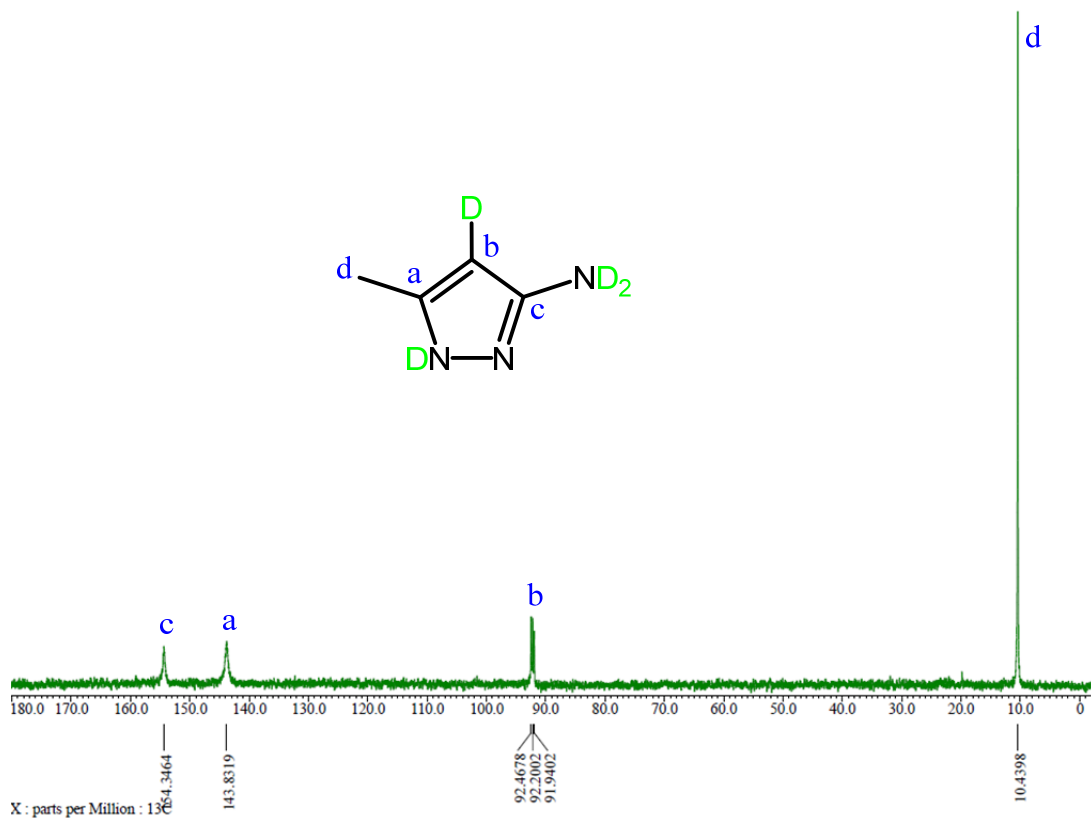

**Figure S36.**  $^{13}\text{C}$  NMR spectrum of 3(5)-amino-5(3)-methylpyrazole- $d_4$  in  $\text{D}_2\text{O}$ .

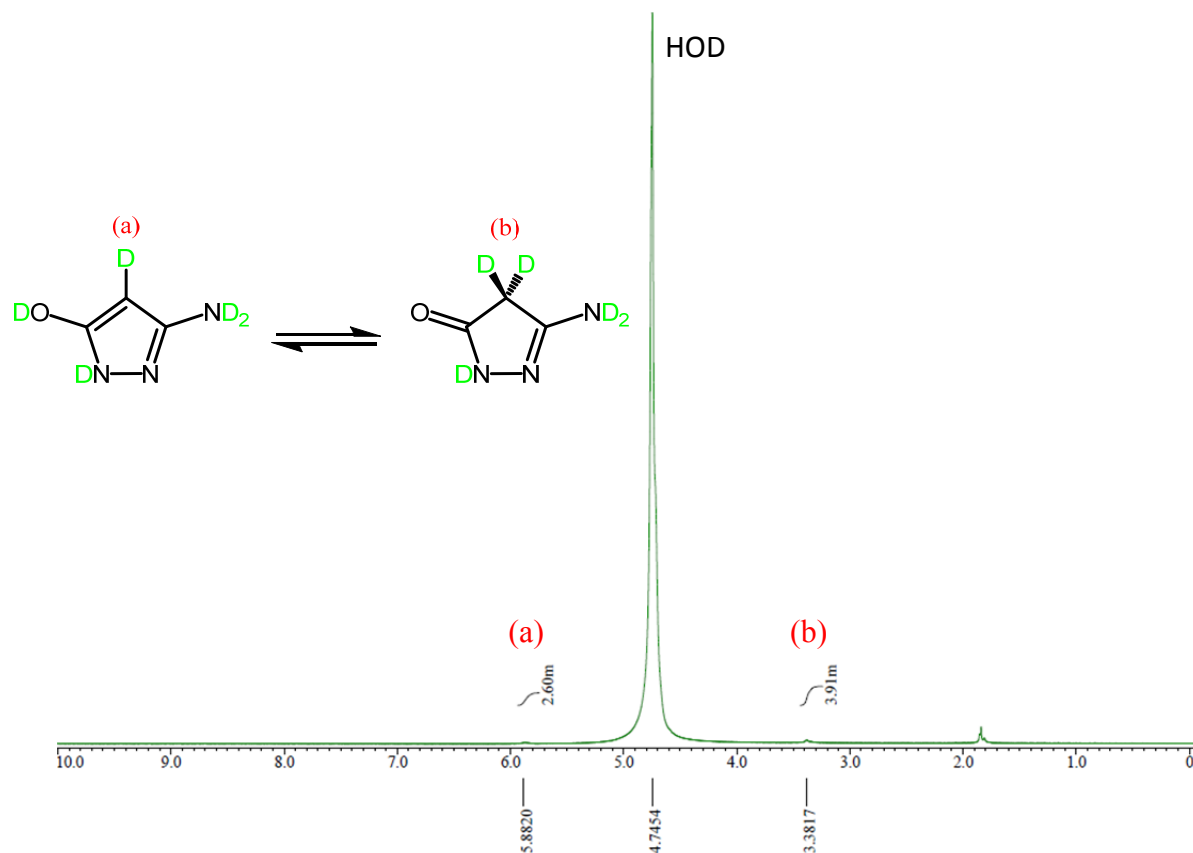

**Figure S37.**  $^1\text{H}$  NMR spectrum of 3(5)-amino-5(3)-hydroxypyrazole- $d_5$  in  $\text{D}_2\text{O}$ .

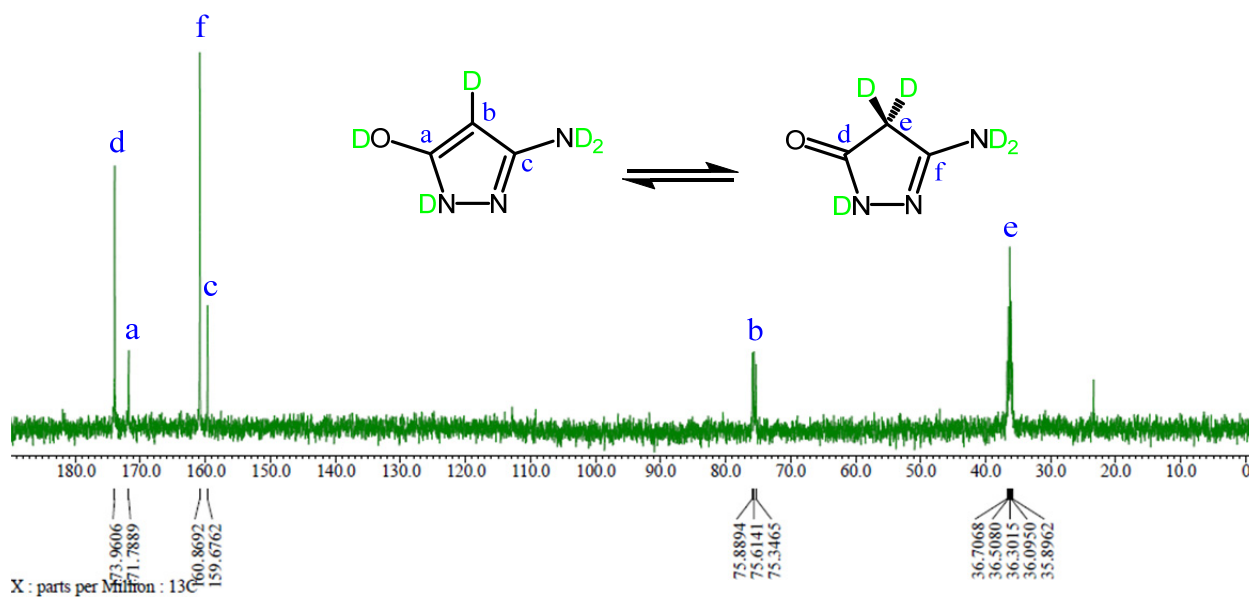

**Figure S38.**  $^{13}\text{C}$  NMR spectrum of 3(5)-amino-5(3)-hydroxypyrazole- $d_5$  in  $\text{D}_2\text{O}$ .

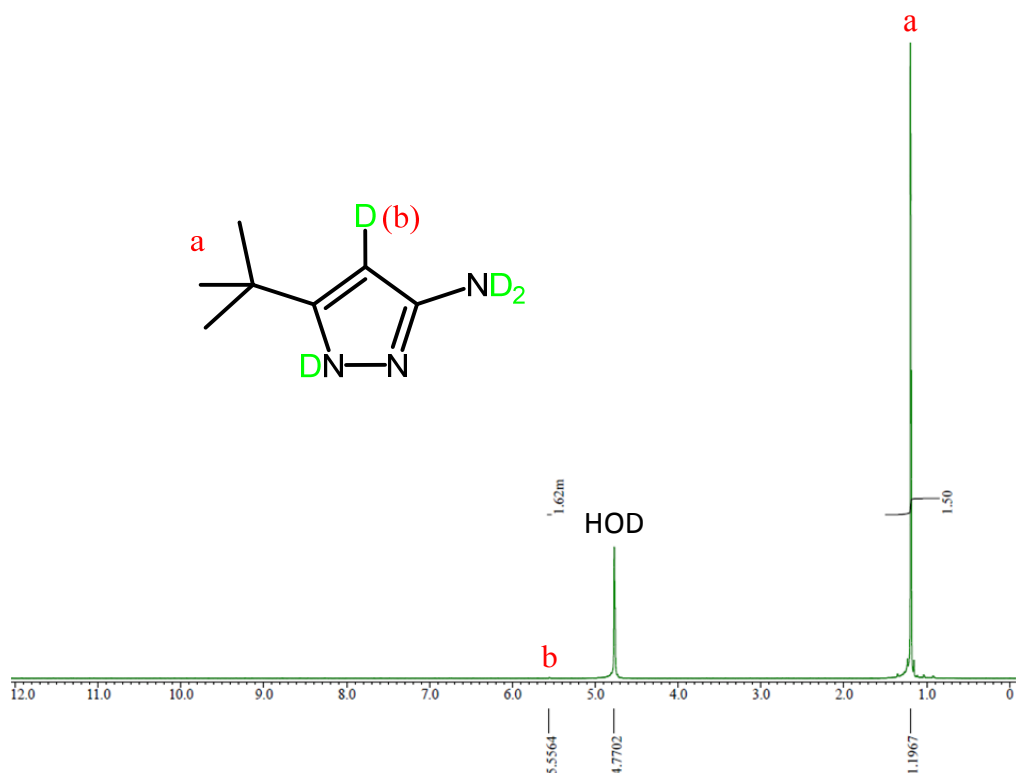

**Figure S39.** <sup>1</sup>H NMR spectrum of 3(5)-amino-5(3)-*tert*-butylpyrazole-*d*<sub>4</sub> in D<sub>2</sub>O.

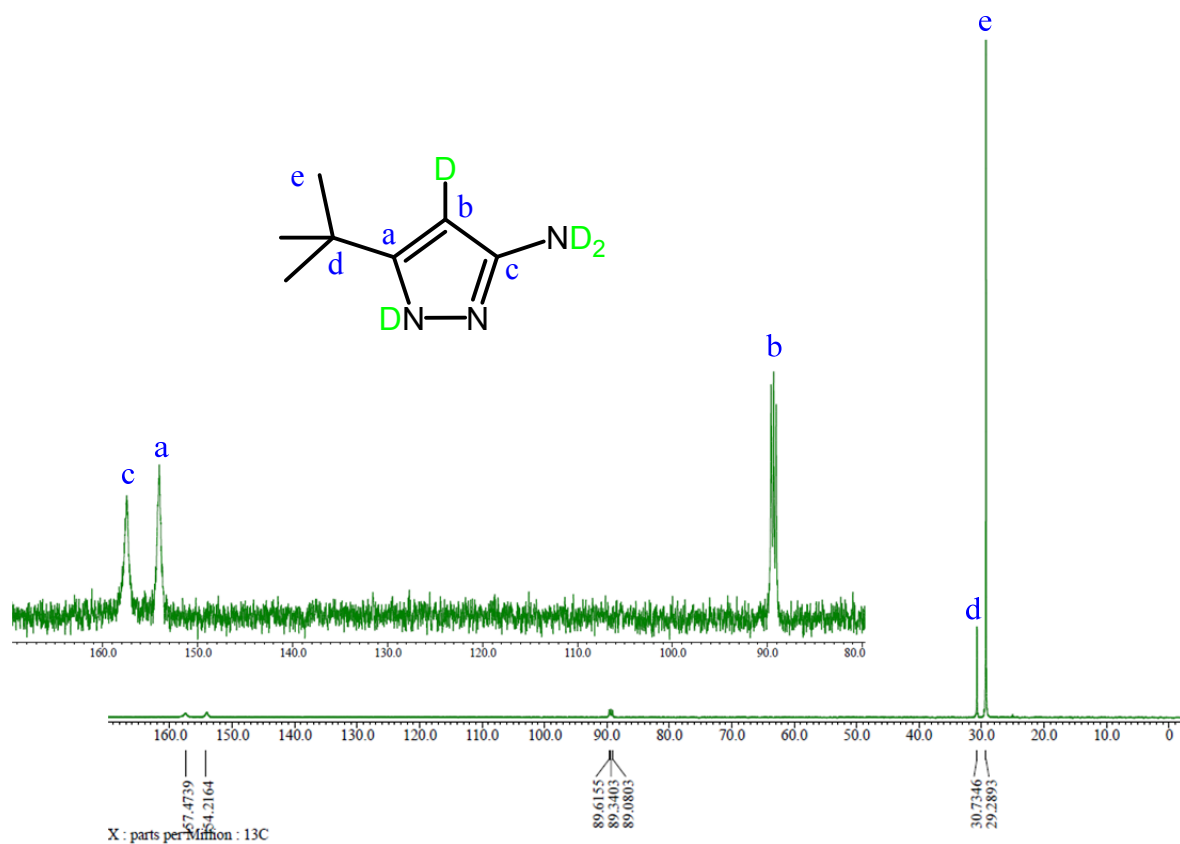

**Figure S40.** <sup>13</sup>C NMR spectrum of 3(5)-amino-5(3)-*tert*-butylpyrazole-*d*<sub>4</sub> in D<sub>2</sub>O.

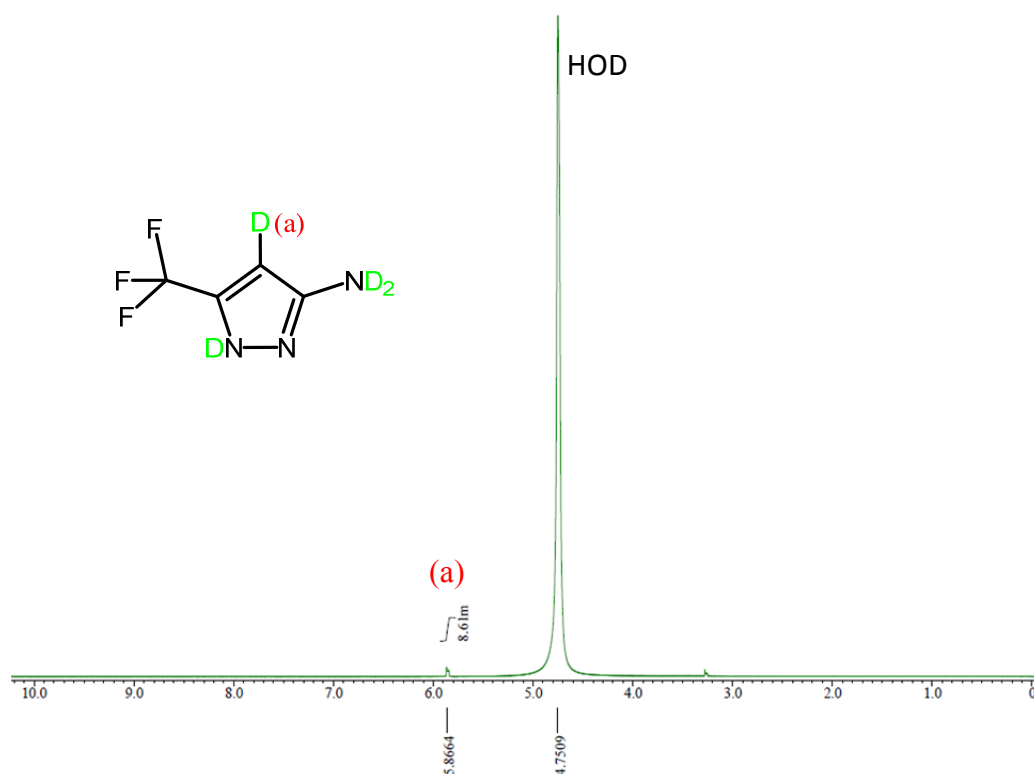

**Figure S41.** <sup>1</sup>H NMR spectrum of 3(5)-amino-5(3)-trifluoromethylpyrazole-*d*<sub>4</sub> in D<sub>2</sub>O.

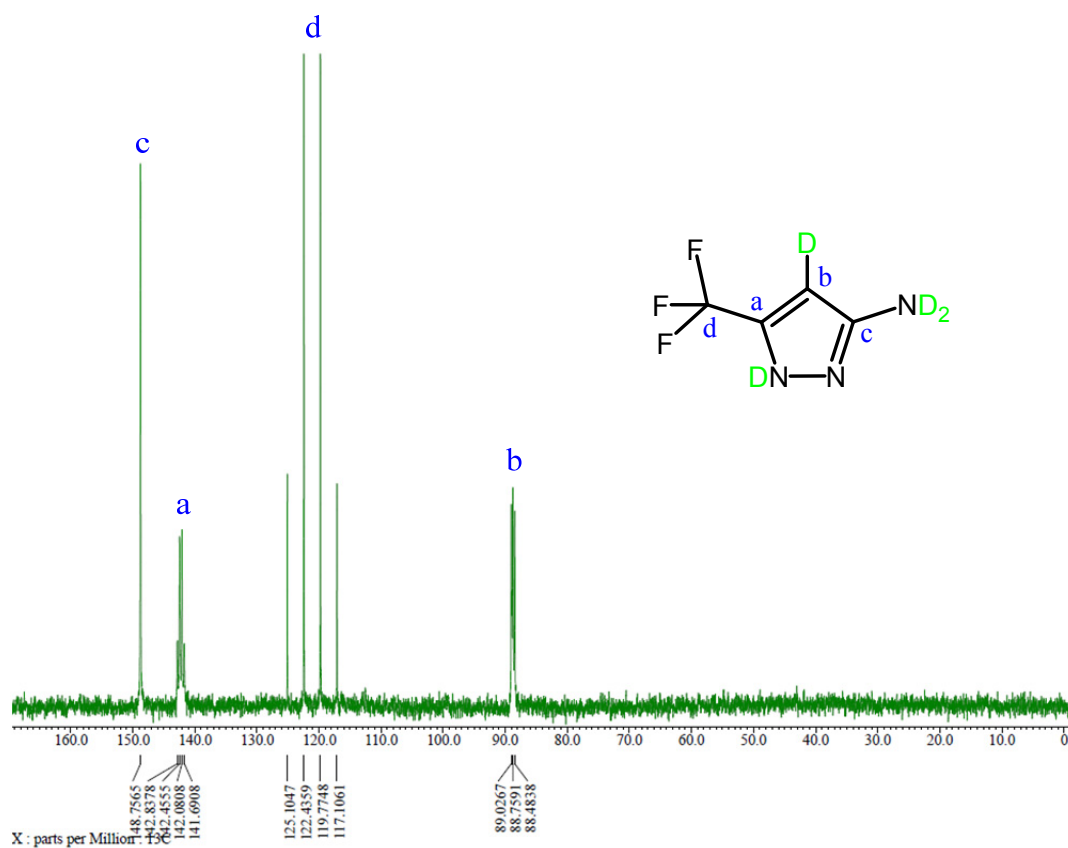

**Figure S42.** <sup>13</sup>C NMR spectrum of 3(5)-amino-5(3)-trifluoromethylpyrazole-*d*<sub>4</sub> in D<sub>2</sub>O.

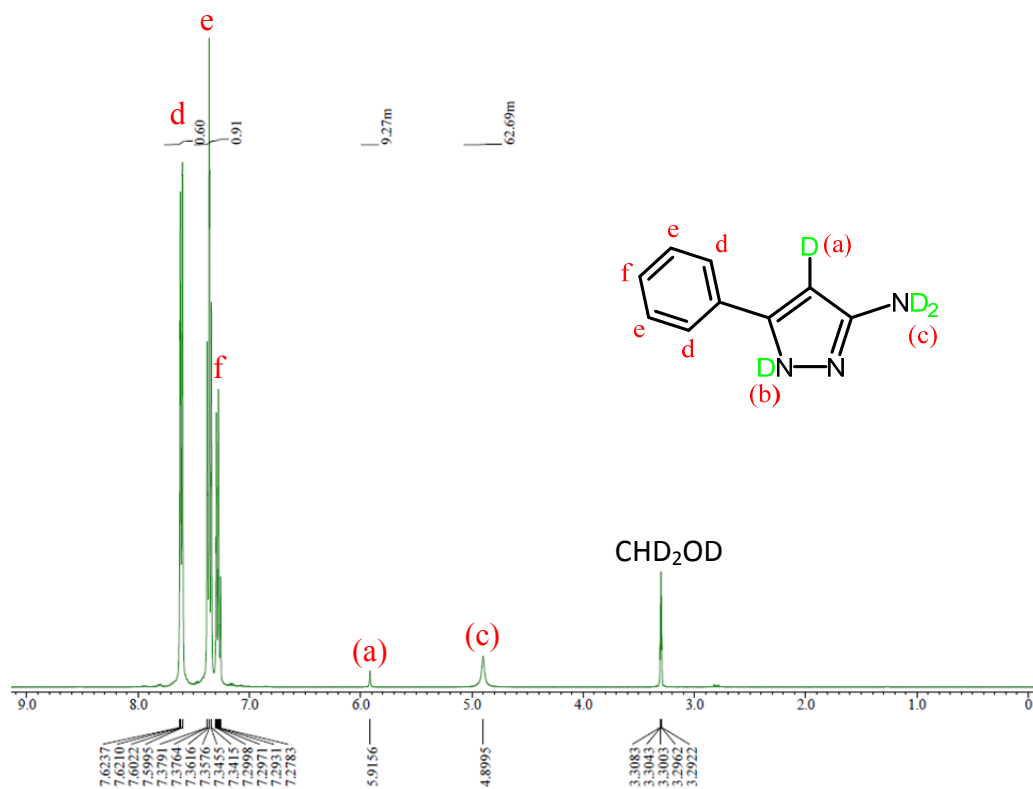

**Figure S43.** <sup>1</sup>H NMR spectrum of 3(5)-amino-5(3)-phenylpyrazole-*d*<sub>4</sub> in CD<sub>3</sub>OD.

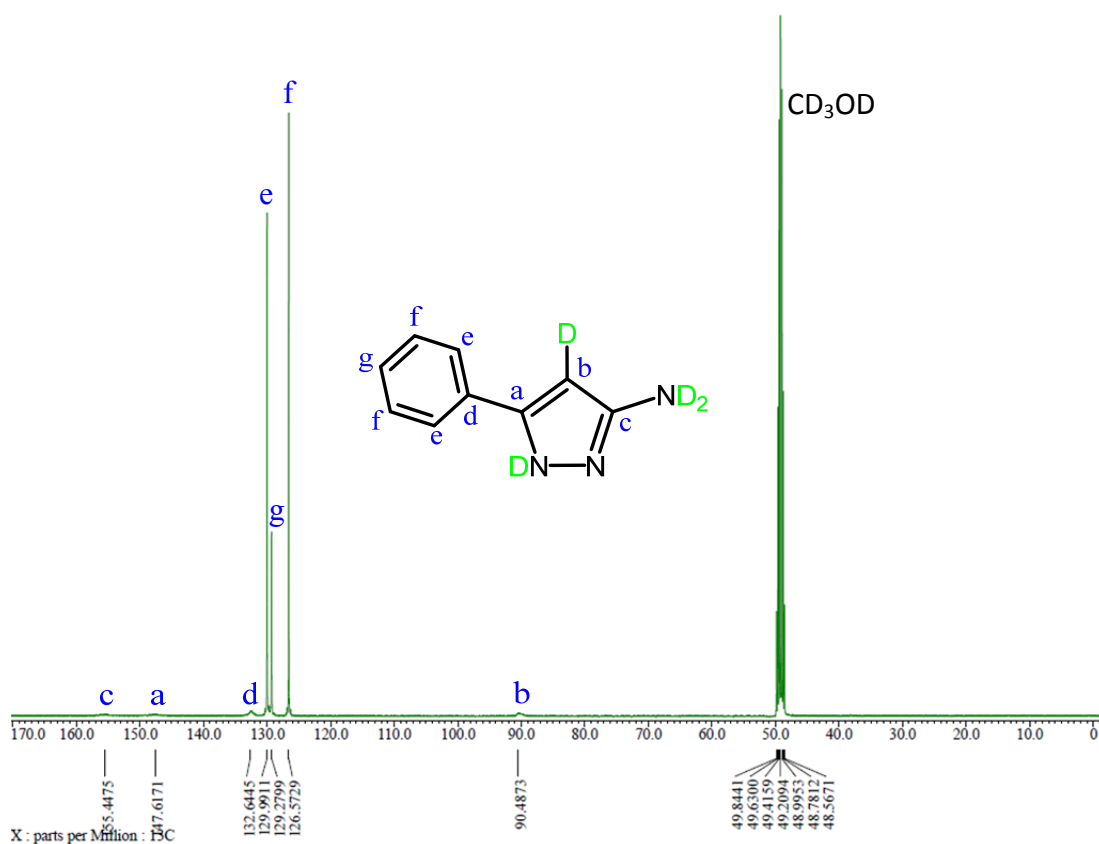

**Figure S44.** <sup>13</sup>C NMR spectrum of 3(5)-amino-5(3)-phenylpyrazole-*d*<sub>4</sub> in CD<sub>3</sub>OD.
